# Supplementary material for: Robust Data-Driven Auditory Profiling Towards Precision Audiology
Source: PubMed Central journal article supplement — Trends Hear. 2020 Dec 3;24:2331216520973539. doi: 10.1177/2331216520973539 (PMC7720332; doi:10.1177/2331216520973539), 2020-12-03

# BMR

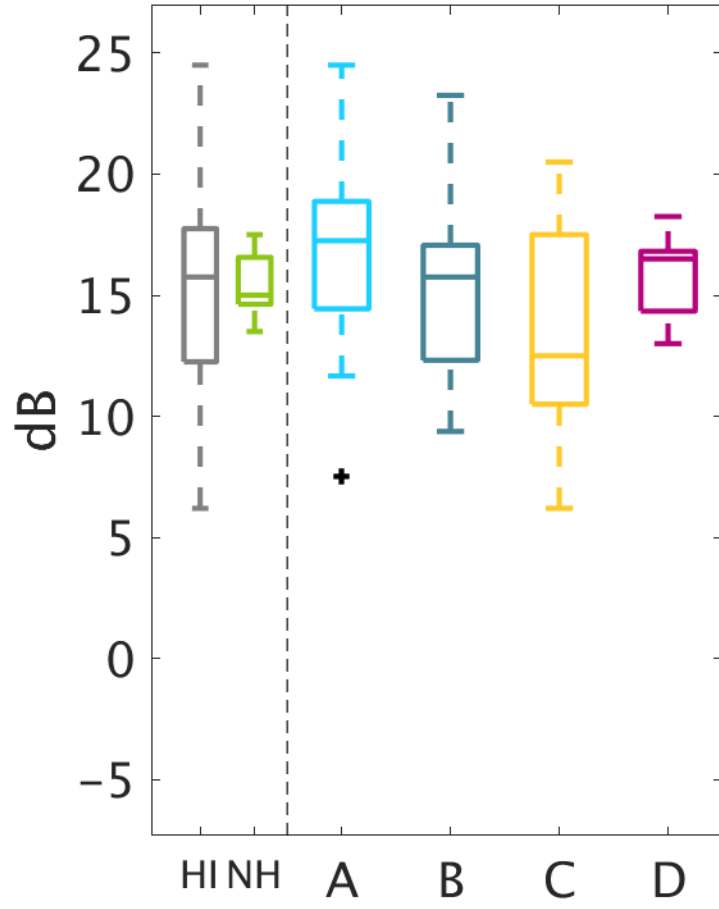

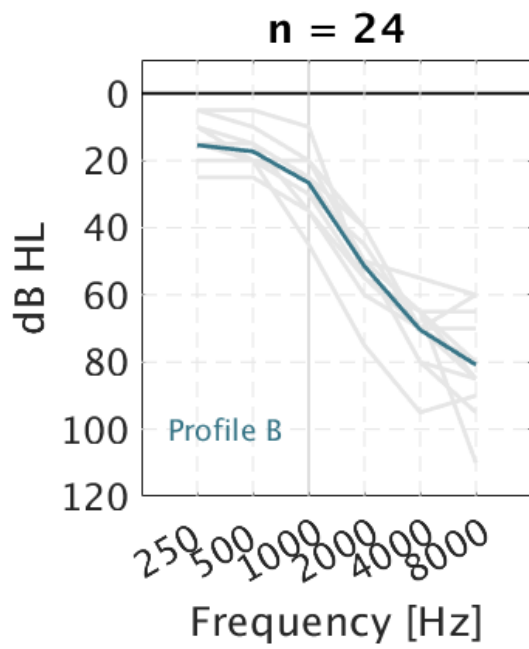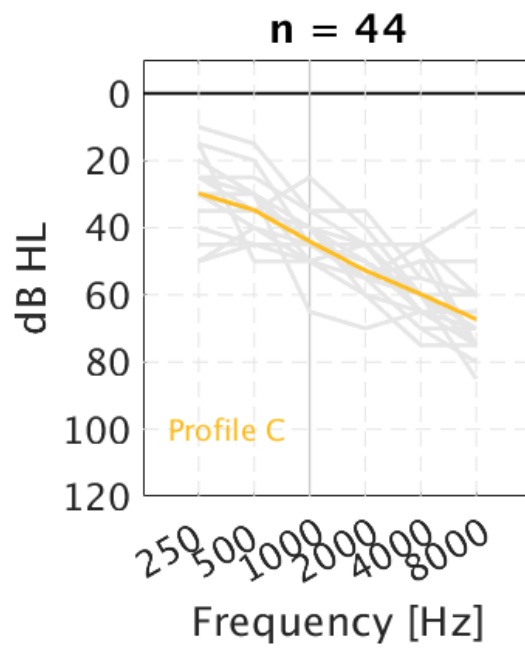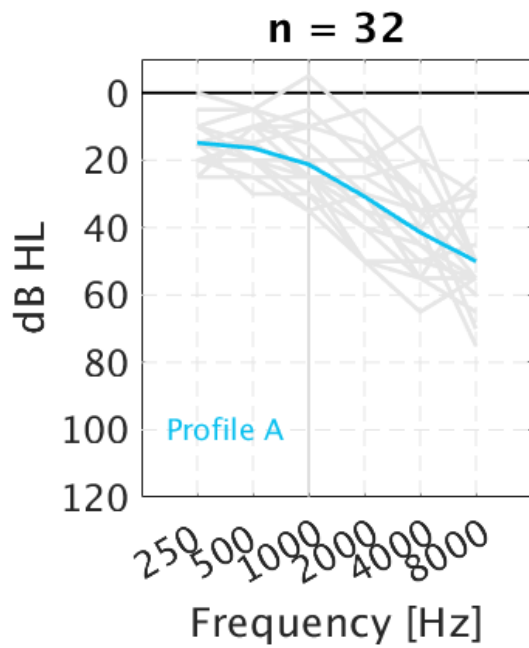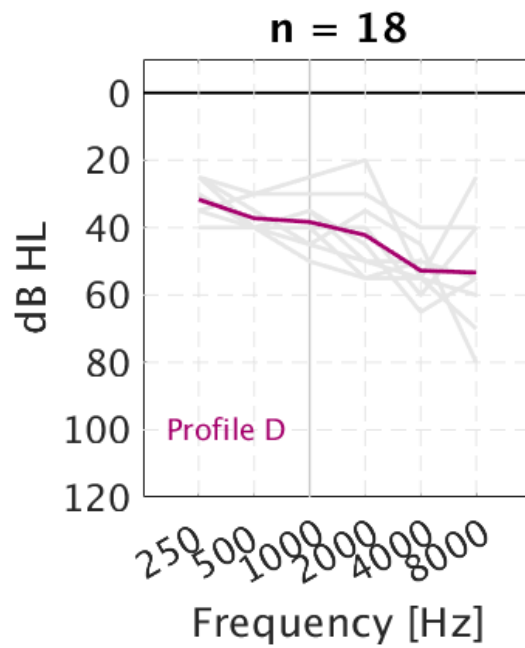

# AUD<sub>LF</sub>

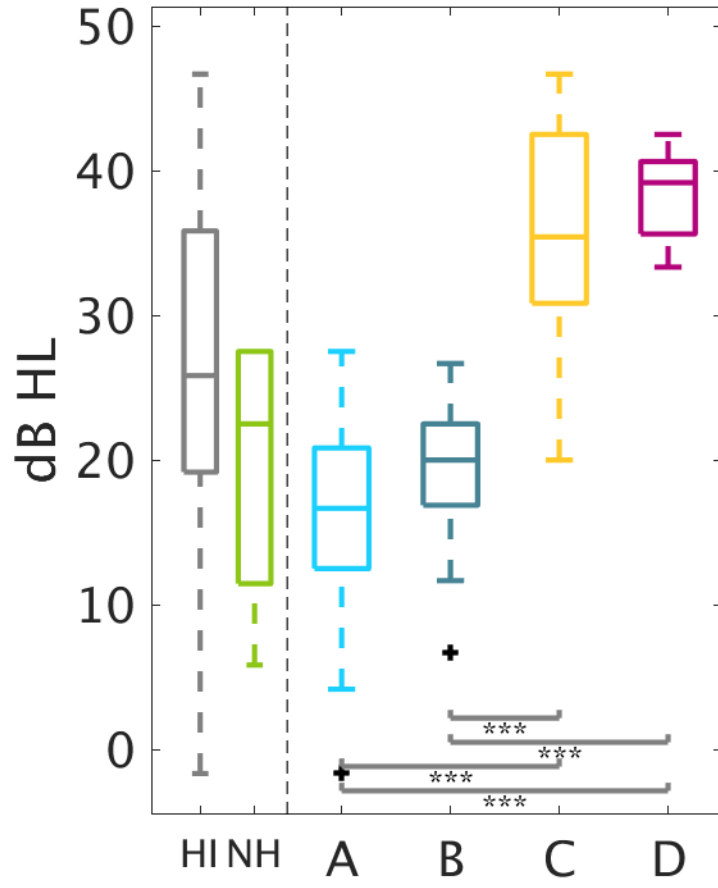

# AUD<sub>HF</sub>

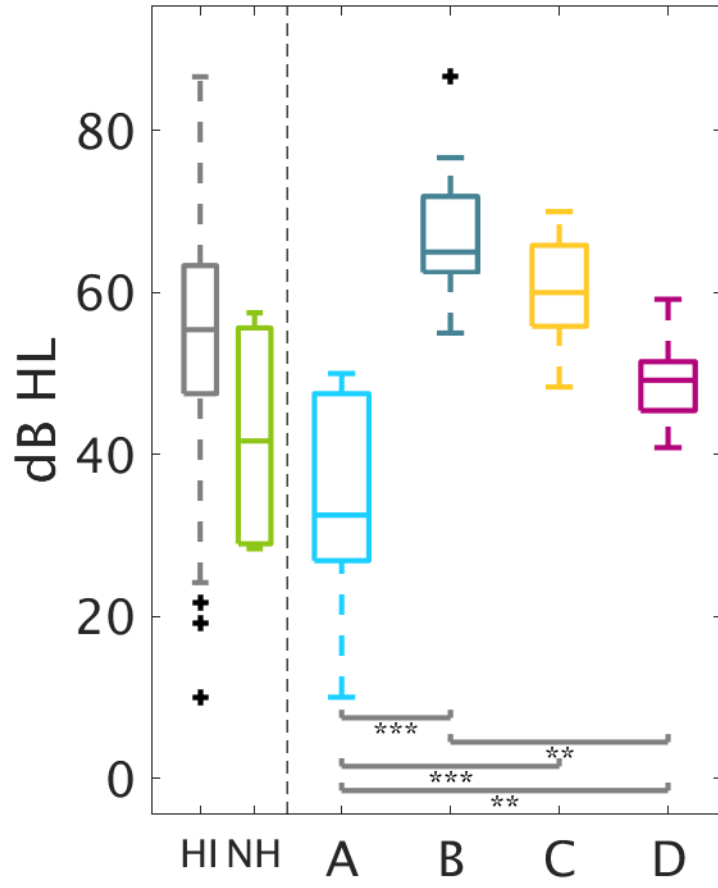

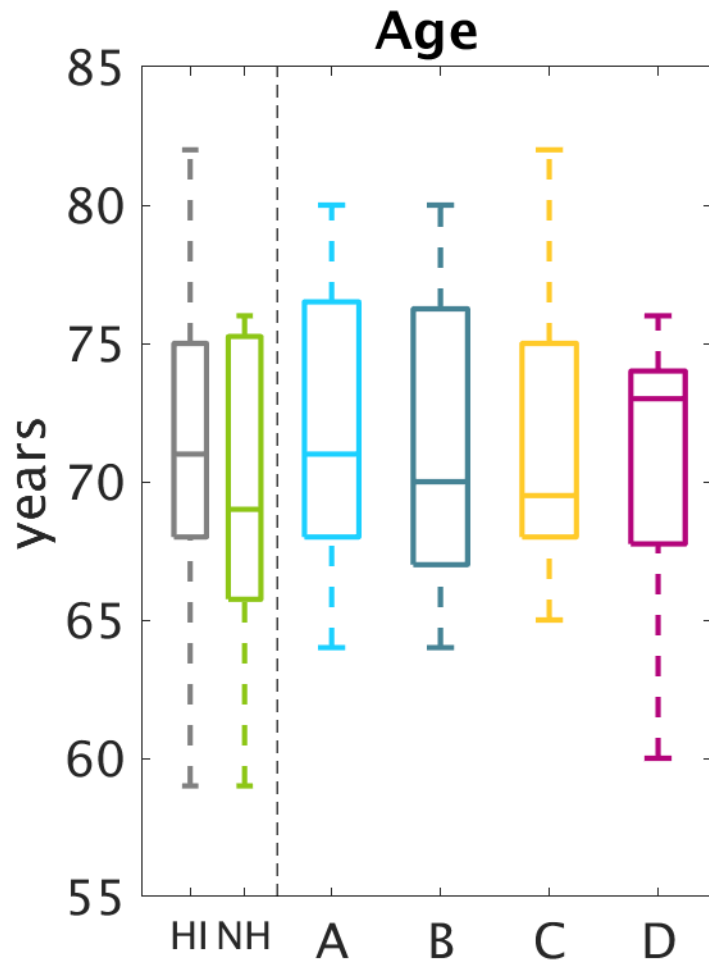

# TMR<sub>LF</sub>

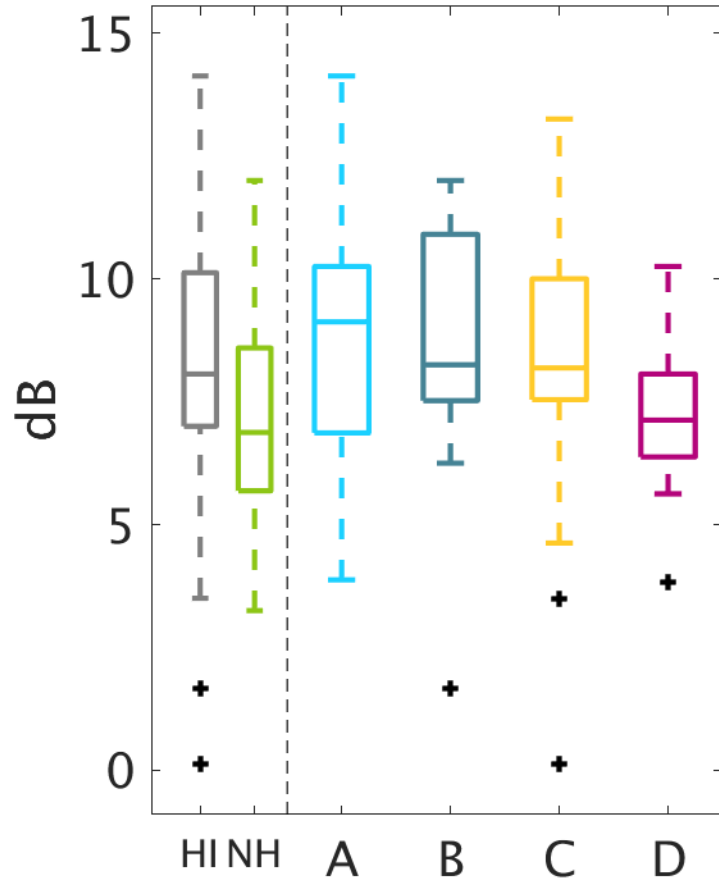

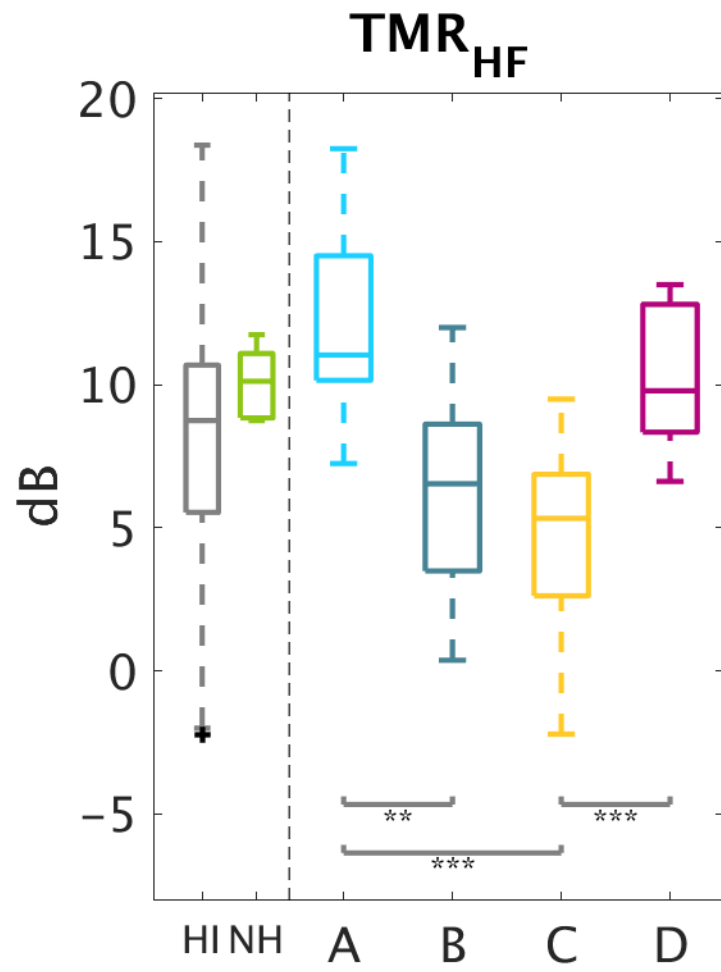

TiN<sub>LF</sub>

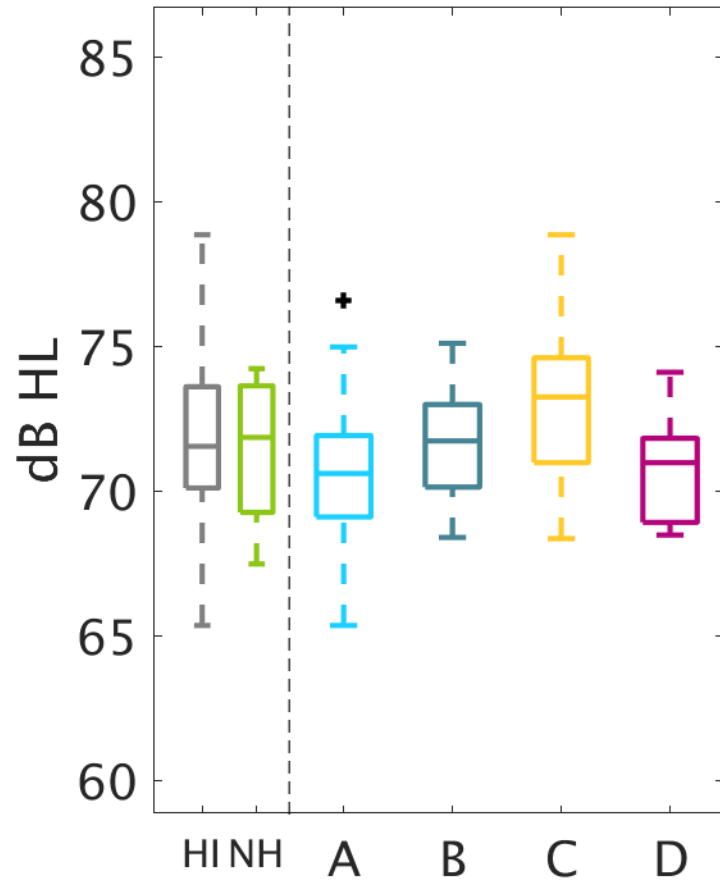



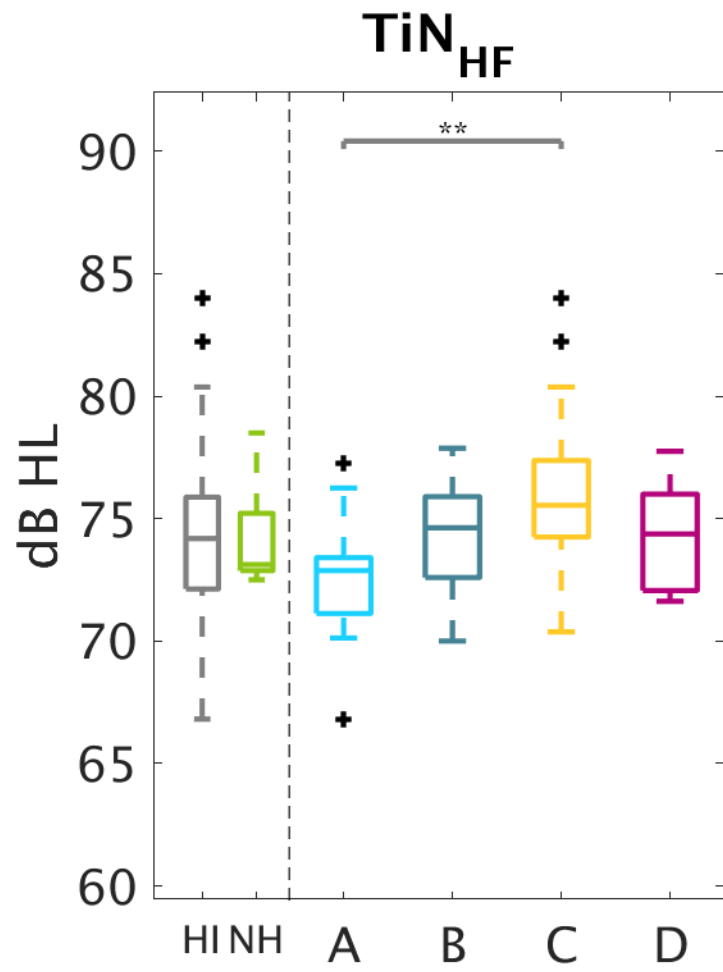

# sSTM<sub>8</sub>

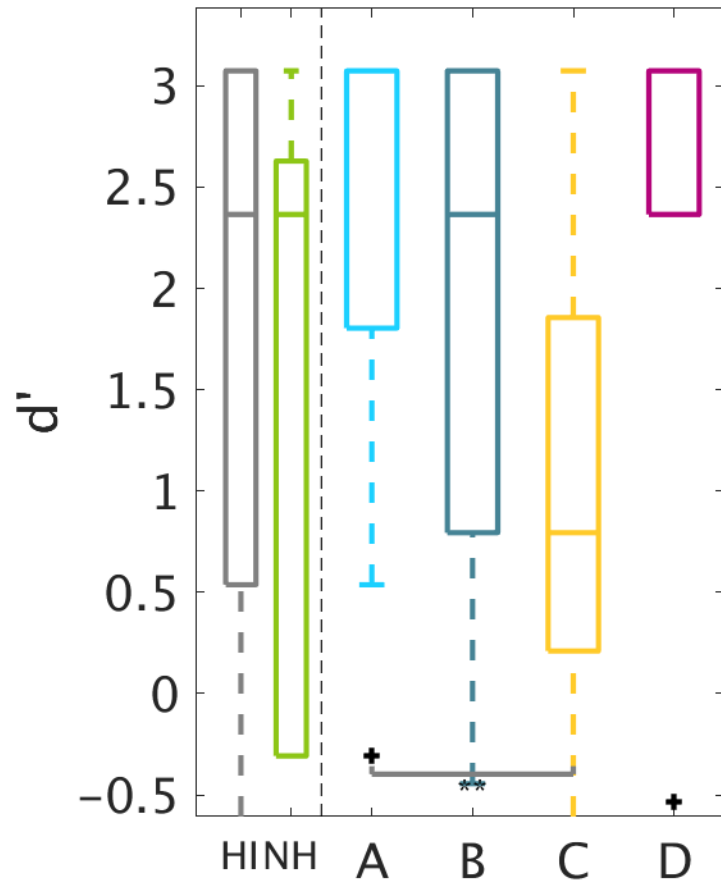

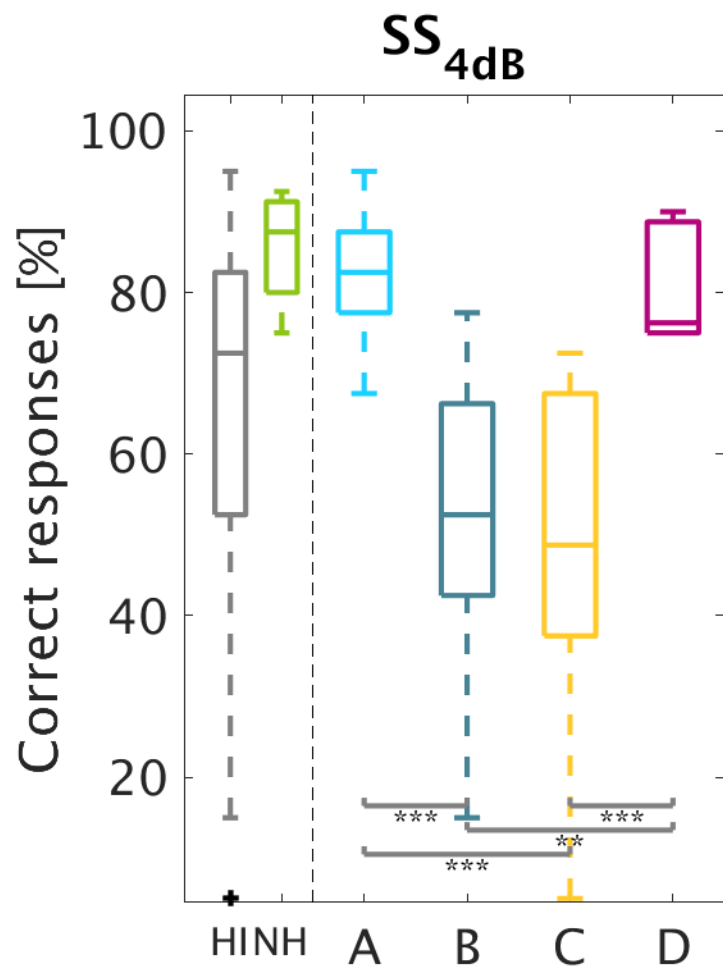

# SRT<sub>Q</sub>

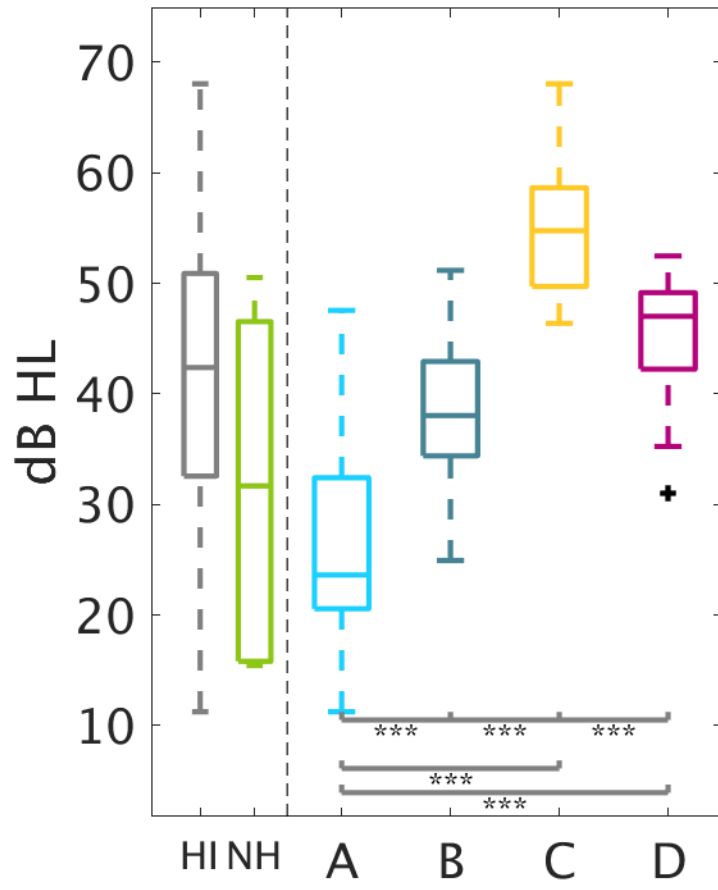

# SRT<sub>N</sub>

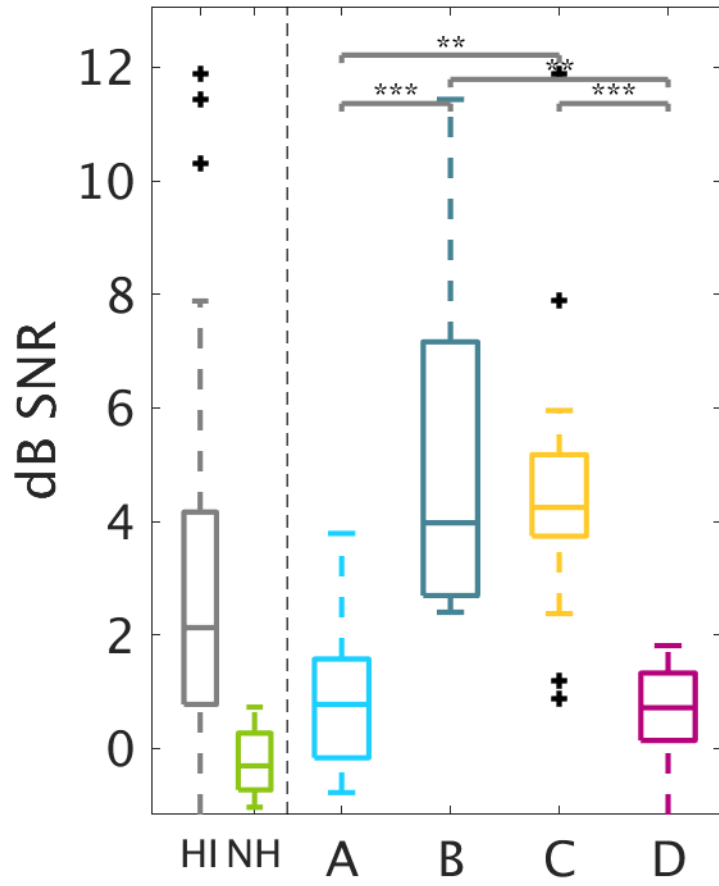

# SMR<sub>LF</sub>

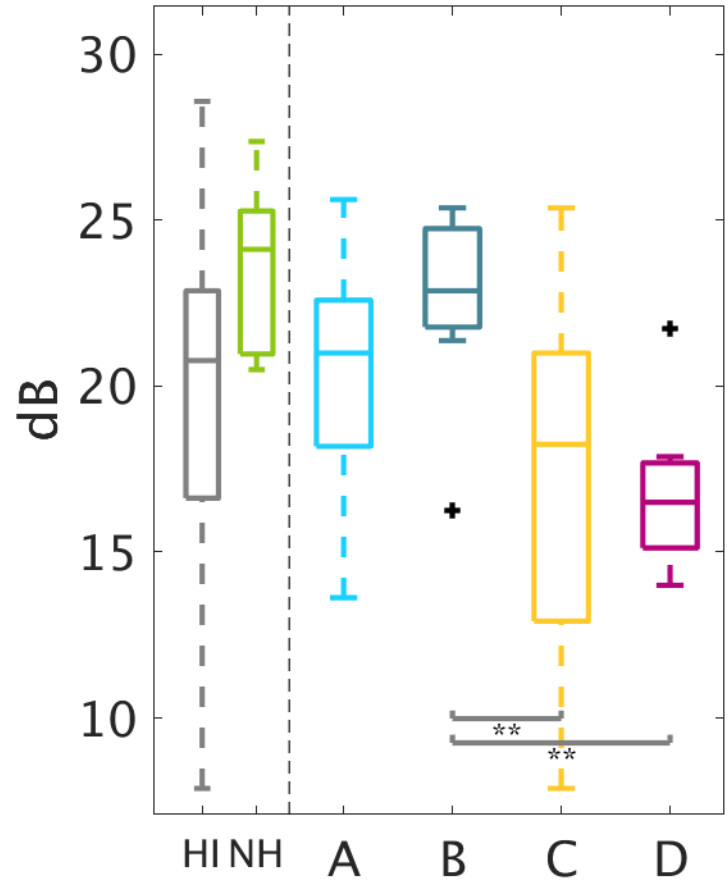

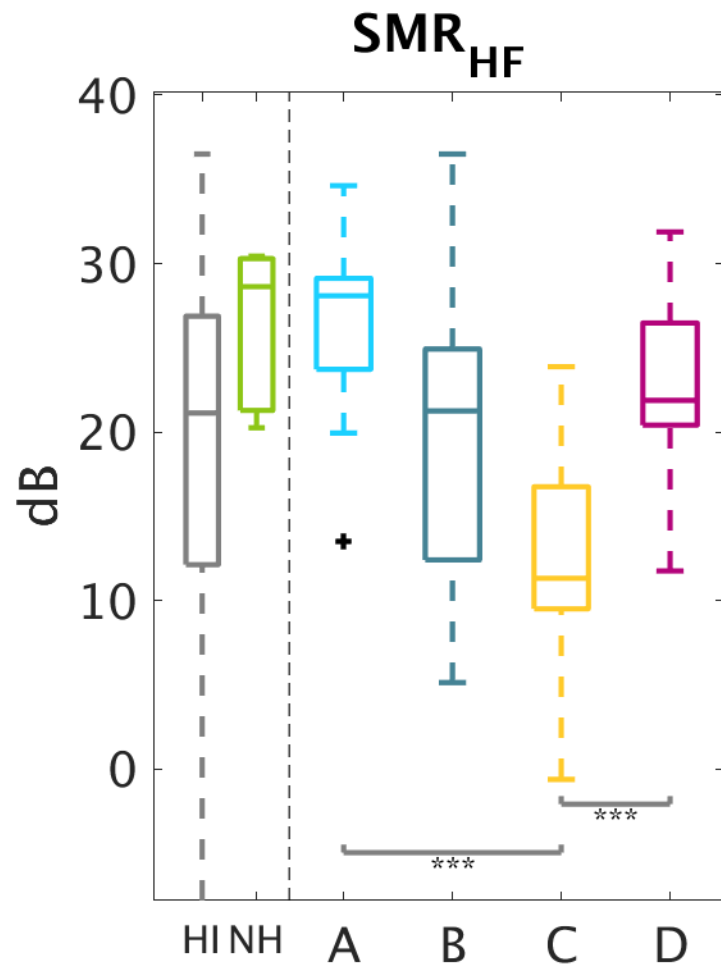

# Slope<sub>LF</sub>

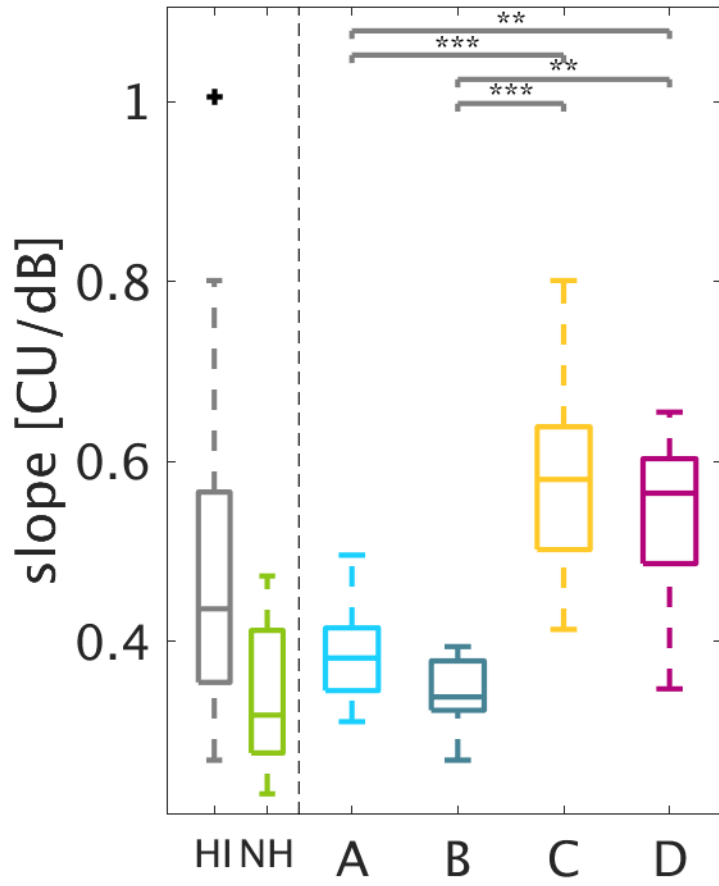



# Slope<sub>HF</sub>

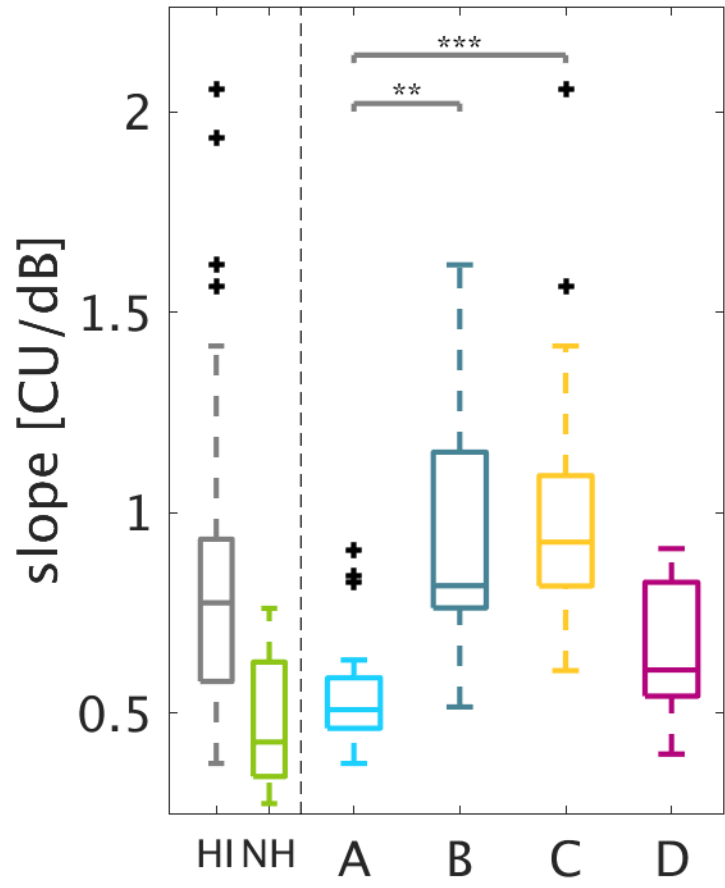

# MCL<sub>LF</sub>

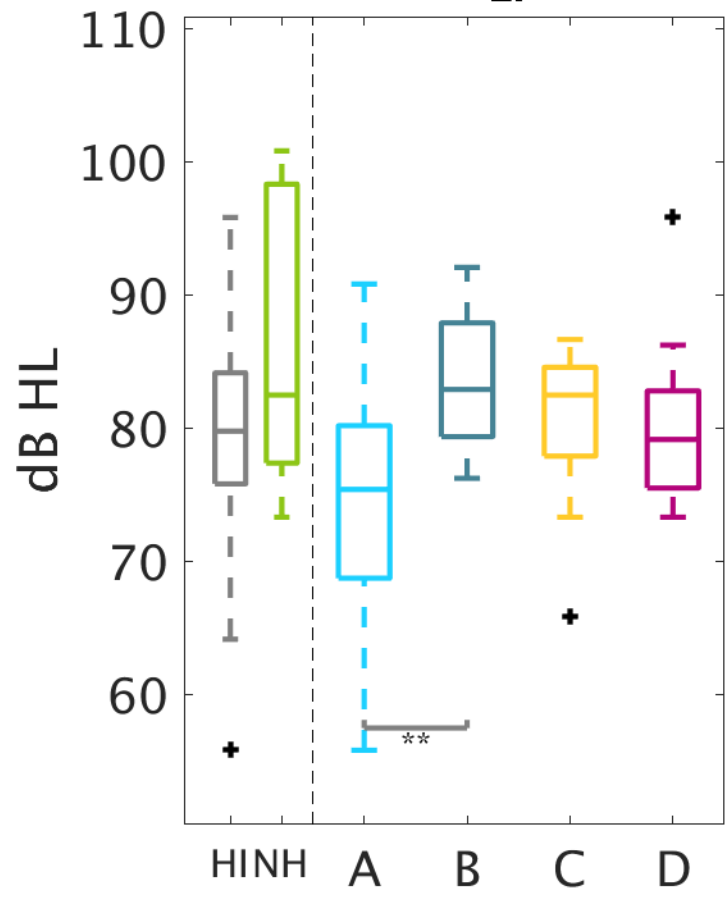

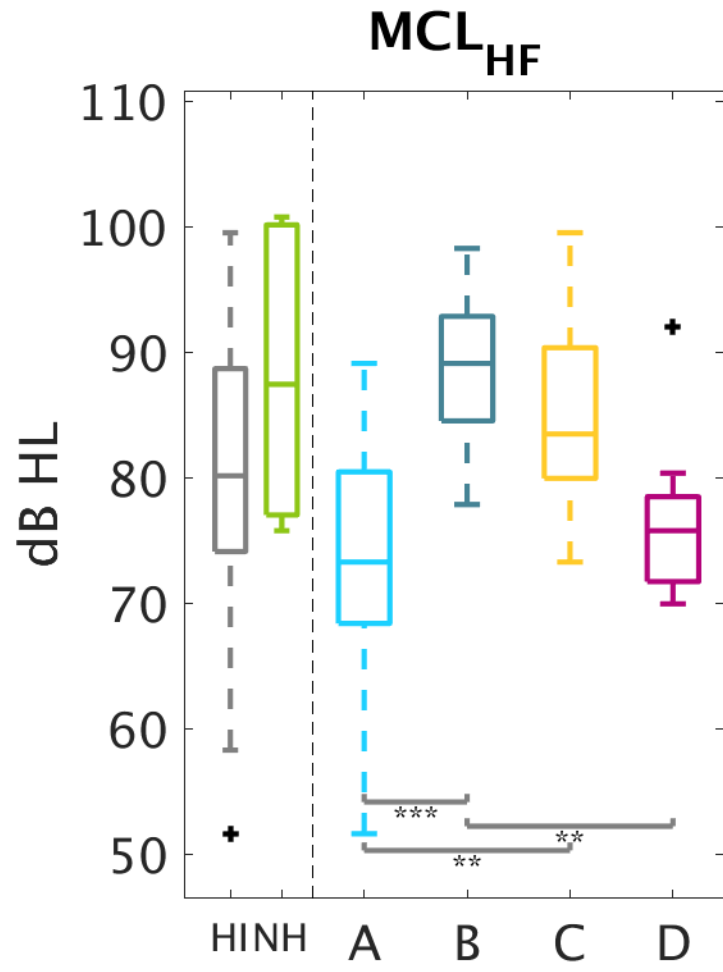

# maxDS

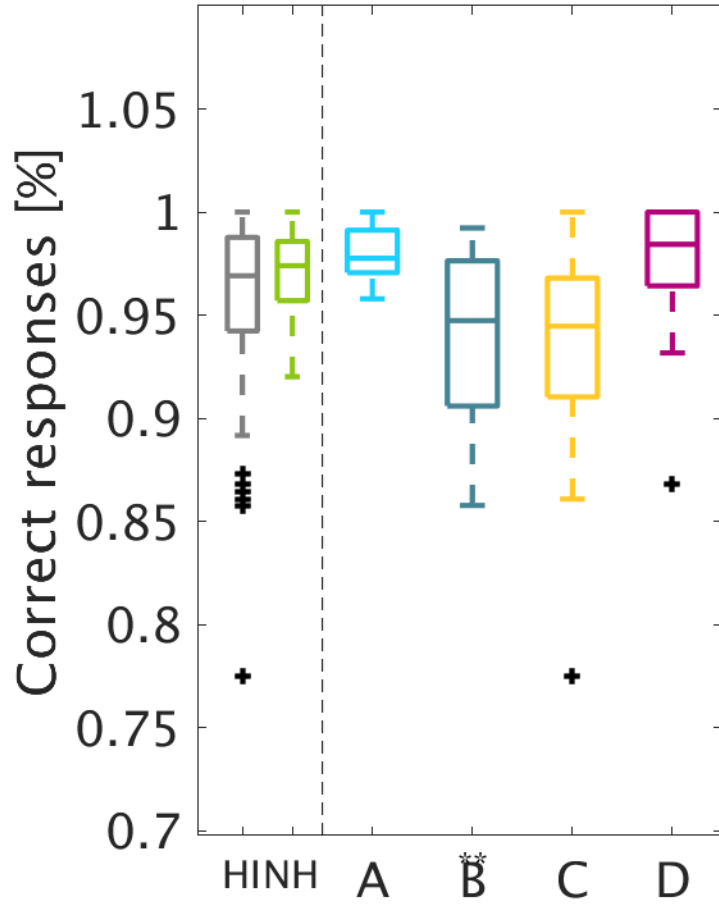

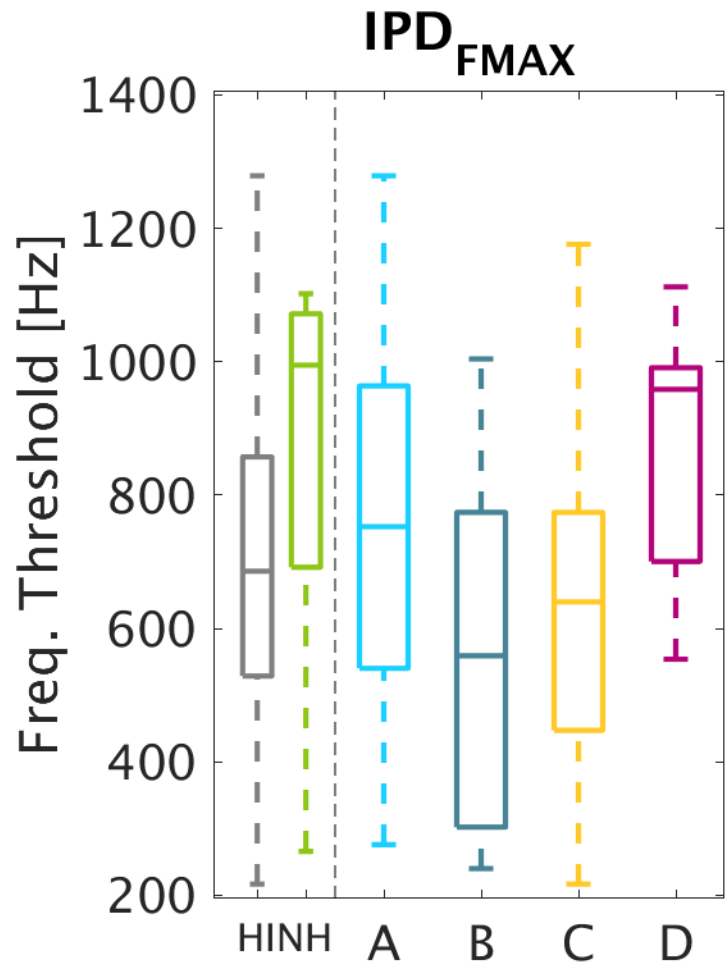

# HTL<sub>LF</sub>

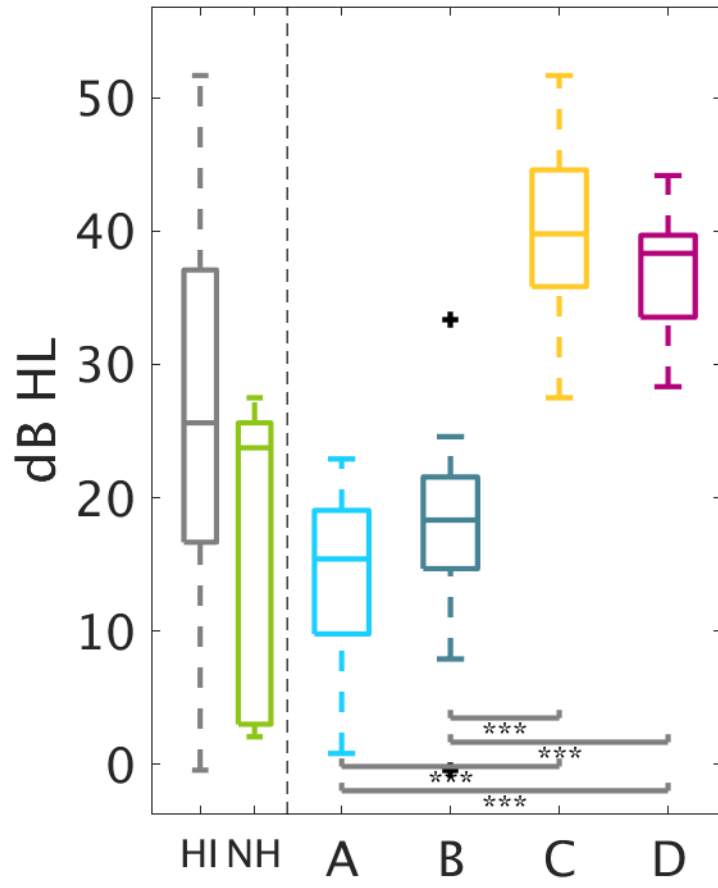

# HTL<sub>HF</sub>

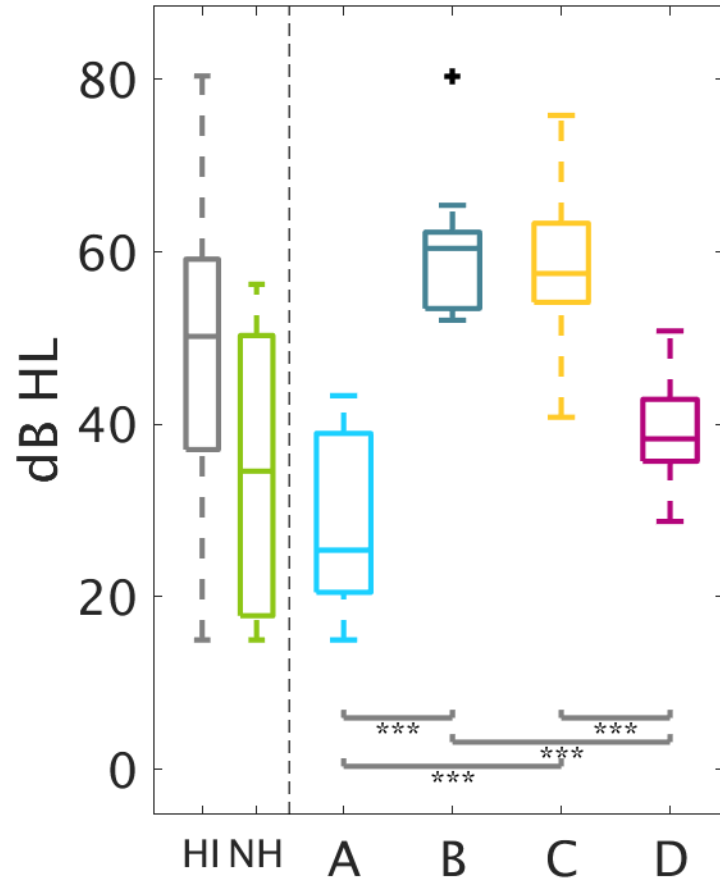

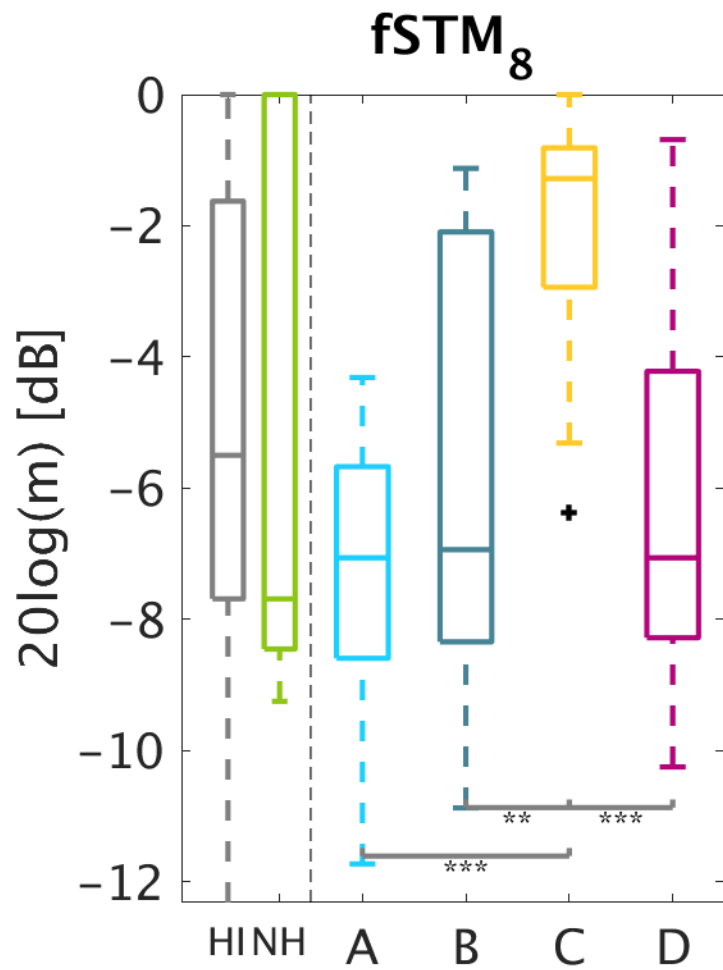



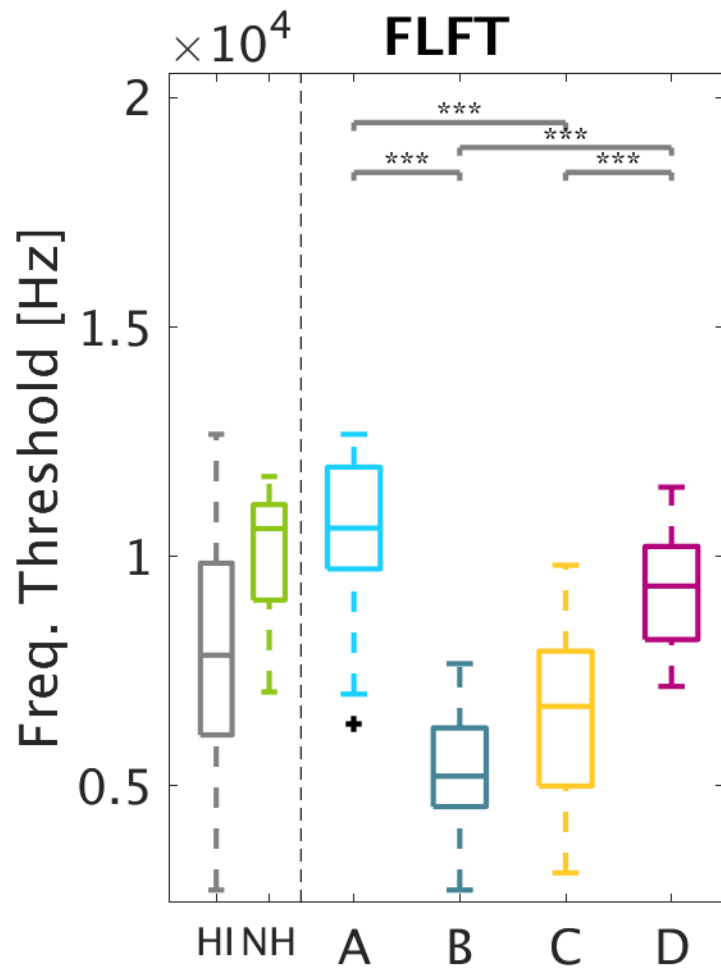

# DynR<sub>LF</sub>

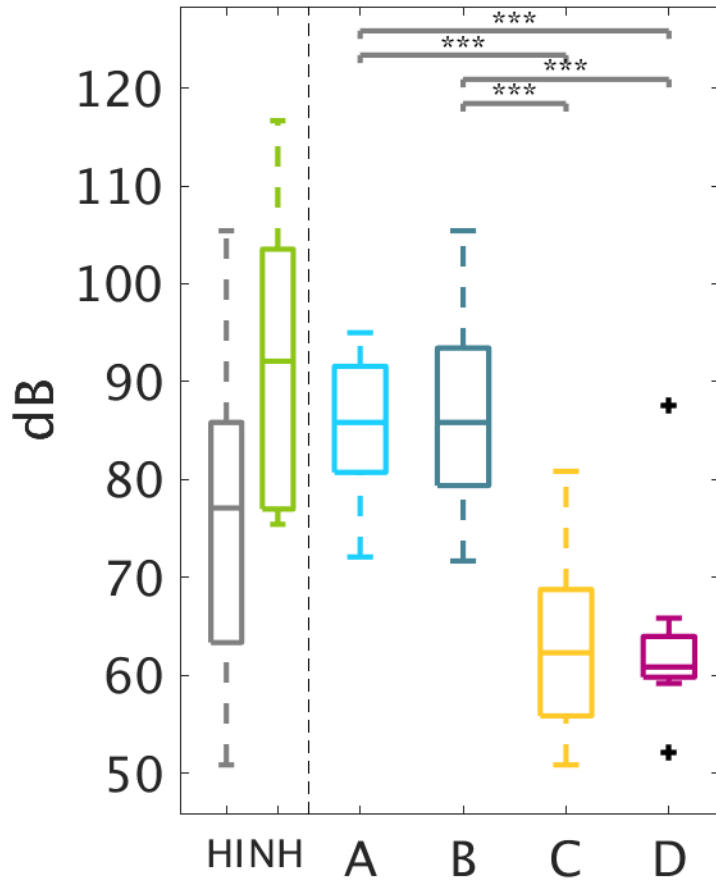

# DynR<sub>HF</sub>

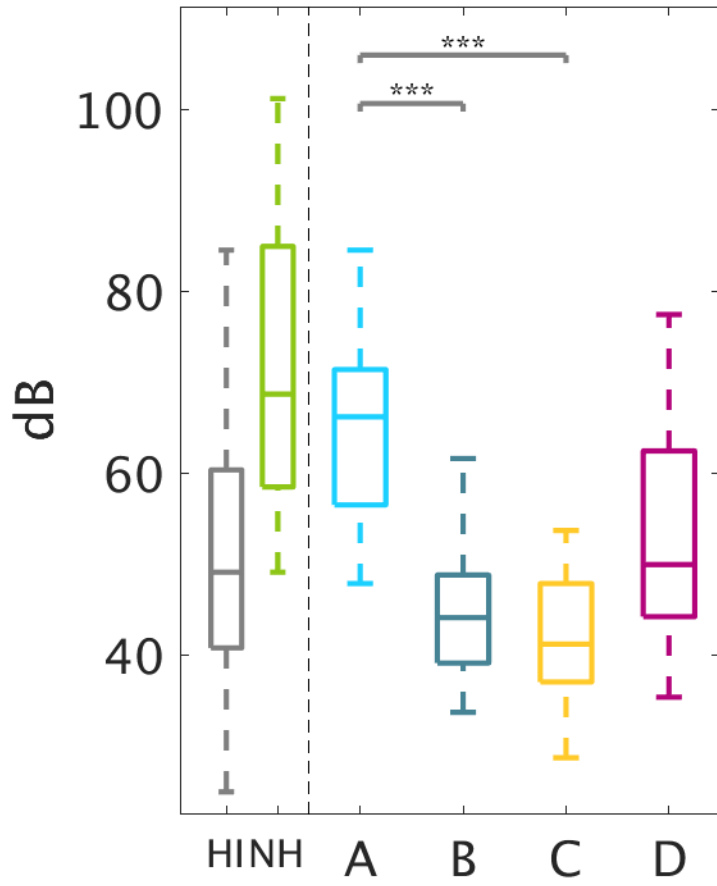

BP<sub>20</sub>

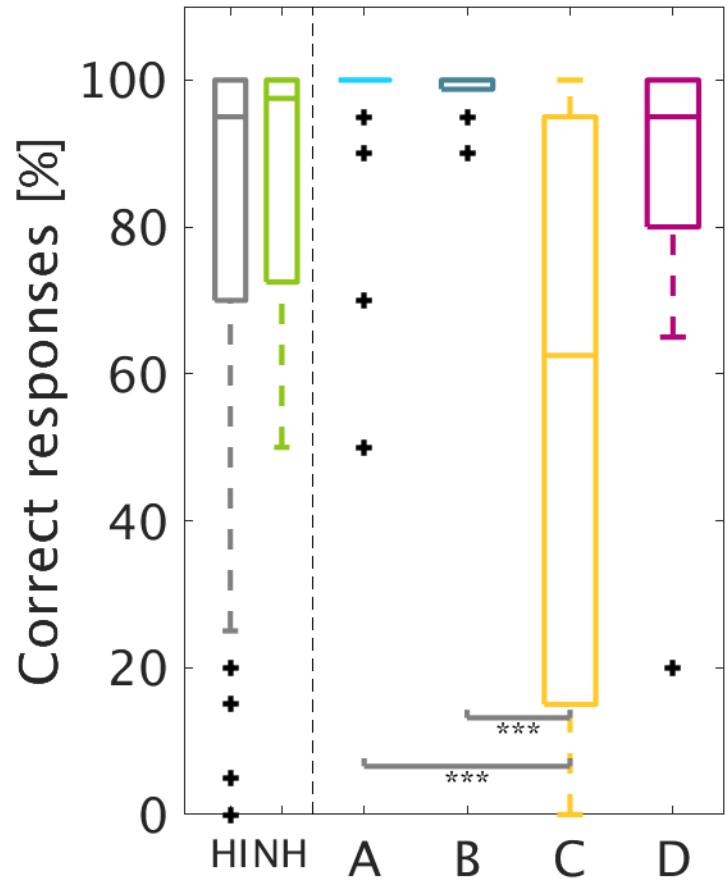

Supplement: sj-pdf-1-tia-10.1177_2331216520973539.pdf [file sj-pdf-1-tia-10.1177_2331216520973539.pdf]
